# Supplementary material
Source: PubMed Central journal article supplement (PMC2778157)
Supplement: supp_180_10_982__1.pdf [file supp_180_10_982__1.pdf]

## **Online Data Supplement**

### **Tension time index as a predictor of extubation outcome in ventilated children**

Gopinathannair Harikumar MRCPCH, Yaya Egberongbe (MRCPCH), Simon Nadel FRCP, Elizabeth Wheatley, John Moxham MD, Anne Greenough MD FRCPCH and Gerrard F Rafferty PhD.

## **Methods**

### **Patients**

This prospective study was conducted in the Variety Club Children's Hospital Pediatric Intensive Care Unit at King's College Hospital, London and the Pediatric Intensive Care Unit at St Mary's Hospital, London. The pediatric intensive care unit at Kings College Hospital had 6 senior clinicians and at St Marys Hospital 7 senior clinicians. All children who were mechanically ventilated for more than 24 hours were eligible for entry into the study. Children were excluded from the investigation if prior attempts at extubation had not been successful or if long-term noninvasive ventilation had been required. Invasive measurements were not performed in children with esophageal varices. Parents or carers of eligible subjects were approached for enrolment into the study according to the availability of the researcher as this study was performed on two sites. Parents or carers were given at least 24 hours to decide whether to allow their child to take part in the study. The option to opt out of invasive measurements ie using balloon catheters was given. Informed written consent was obtained before performing the measurements. The study was approved the Research Ethics Committee of King's College Hospital NHS Foundation Trust. Measurements were performed when the children were deemed ready for extubation by the clinical team who were not informed of the results of the measurements.

### **Equipment**

Respiratory flow was measured using a pneumotachograph (series 4500, Hans Rudolph Inc., Kansas City, Mo) attached to a three-way slide valve (Hans Rudolph Inc., Kansas City, MO),  
Harikumar R1

used to occlude the airway, and inserted into the ventilator circuit between the endotracheal tube and ventilator manifold. Mechanical ventilation was unaffected when the valve was in the standby position. Airway pressure ( $P_{aw}$ ) was measured from a side port on the pneumotachograph using a differential pressure transducer (MP45, Validyne Corporation, Northridge CA, USA). Transdiaphragmatic pressure ( $P_{di}$ ) was recorded using 5 cm long balloon catheters positioned in the mid oesophagus (oesophageal pressure,  $P_{es}$ ) and stomach (gastric pressure,  $P_{gas}$ ) (Ackrad Laboratories, Cranford, NJ, USA). Correct positioning of the gastric balloon catheter was confirmed by positive pressure generation during inspiration while the position of the oesophageal balloon catheter was checked by comparing  $P_{es}$  to  $P_{aw}$  during an occluded inspiratory effort (E1, E2). Agreement of  $P_{es}$  and  $P_{aw}$  within 94% and 103% indicated that the balloon was correctly located in the lower third of the oesophagus and intrathoracic pressure could be reliably estimated.

The flow and pressure signals were recorded and displayed in real time on a computer running a Labview software application (National Instruments, Austin TX, USA) with 100 Hz analog to digital sampling (DAQ 16XE-50, National Instruments, Austin TX USA). Tidal volume was obtained by digital integration of the flow signal and  $P_{di}$  by digital subtraction of oesophageal pressure from gastric pressure by the recording software

Lung volume was determined by measurement of functional residual capacity (FRC) using a helium (He) dilution system (Equilibrated Biosystems EB52615, Melville, NY, U.S.A.) with a circuit specifically designed for paediatric use. The circuit contained a rebreathing bag, enclosed in an airtight cylinder, which was filled with a mixture of He and oxygen ( $O_2$ ). The rebreathing bag was inserted into the ventilator circuit immediately above the endotracheal tube via a three-

Harikumar R1

way valve. Actuation of the valve, at end-expiration, connected the patient to the rebreathing bag and diverted flow from the ventilator to the airtight cylinder, thus maintaining mechanical ventilation. The change in He concentration against time was displayed in real time on a flat panel display. Rebreathing of the He/O<sub>2</sub> gas mixture was continued until equilibration of He within the system. The FRC was corrected for oxygen consumption and to body temperature under atmospheric pressure and water vapour saturated conditions. The FRC was expressed as the mean of the paired measurements.

### **Protocol**

All measurements were performed with the patient supine, with stable blood gases and blood pressure and mechanically ventilated at the settings determined by the clinical team. Endotracheal tube suction was undertaken 10 to 15 minutes prior to performing each study. At the start of the study, FRC was measured using the helium gas dilution technique. The three-way sliding valve and pneumotachograph were then inserted into the ventilator circuit and respiratory system compliance (Crs) and resistance (Rrs) measured using the single breath occlusion technique. We have previously shown this technique to provide reliable measurements in mechanically ventilated infants and children (E3). The three-way valve was actuated at end inspiration, briefly occluding the airway, and diverting the resulting passive expiratory flow to atmosphere. The resulting relaxed expiratory flow volume curve and the pressure time trace were analysed to calculate the expiratory time constant (Trs), Crs and Rrs. Crs was calculated by dividing the change in airway pressure by expired volume. Trs was measured as the slope of a best fit line fitted to the expiratory flow volume curve and Rrs by dividing Crs by Trs. Occlusions were maintained for at least 400 ms and only those with a pressure plateau of at least 100 ms were used. The flow volume curve was analysed using the software and those with a

Harikumar R1

linearity of  $>0.99$  for at least 40% of the curve were analysed. Eight to ten occlusions were recorded and the mean value calculated. At least 10 breaths were allowed between occlusions. The resistances of the pneumotachograph and slide valve were subtracted from the total measured resistance to obtain  $R_{rs}$ . In addition, dynamic compliance ( $C_{dyn}$ ) was calculated from the volume delivered by a positive pressure inflation on breaths unaffected by spontaneous respiratory activity.

In those patients whose parents or carers had given consent, balloon catheters were then inserted and correctly positioned. The patient was switched over to continuous positive airway pressure (CPAP) and following stabilization, two minutes of spontaneous tidal breathing was recorded. From this recording respiratory flow and pressure variables including tidal volume ( $V_t$ ), inspiratory time ( $T_i$ ), total time for the breath ( $T_{tot}$ ), respiratory rate, the mean transdiaphragmatic pressure per breath (meanPdi) and the transdiaphragmatic (PTPdi) pressure time products, were measured. The PTPdi provides an assessment of the work of breathing performed by the diaphragm and is calculated from the area subtended by the Pdi waveform (E4). A series of end expiratory airway occlusions were then performed using a unidirectional valve attached to the expiratory port of the slide valve, which allowed expiration but not inspiration. Baseline respiratory drive, as assessed by the pressure generated in the first 100 ms ( $P_{0.1}$ ) of the first inspiratory effort of each occlusion, maximal inspiratory airway ( $P_{imax}$ ) pressure and maximal transdiaphragmatic ( $P_{dimax}$ ), if balloon catheters were present, were recorded. All occlusions were maintained for approximately 8 breaths or 15 seconds whichever was longer, at least three sets of occlusions were performed and the average for  $P_{0.1}$  and the maximum for  $P_{imax}$ , and  $P_{dimax}$  recorded. Subjects were monitored and airway occlusion discontinued if

desaturation or bradycardia occurred. Sufficient time was allowed to elapse between occlusions for the patient to settle to quiet tidal breathing.

TTdi was calculated as the  $\text{meanPdi/Pdimax} \times \text{Ti/Ttot}$  and TTmus calculated as  $\text{mean inspiratory airway pressure/Pimax} \times \text{Ti/Ttot}$ . Mean inspiratory airway pressure (meanPi) was obtained from the formula  $5 \times \text{P0.1} \times \text{Ti}$ . Two additional combined indices were also calculated, RSB, from the ratio of the spontaneous respiratory rate to tidal volume corrected for body weight and the CROP index calculated by multiplying Cdyn corrected for body weight by the arterial/alveolar oxygen ratio and Pimax and then divided by respiratory rate. Immediately before extubation a sample for blood gas analysis was taken from an indwelling arterial catheter sited for clinical purposes. Alveolar oxygen ( $\text{PAO}_2$ ) was calculated using the simplified alveolar gas equation  $\text{PAO}_2 = [\text{FIO}_2 \times (\text{P}_B - 47)] - \text{PaCO}_2$ , where  $\text{P}_B$  is the barometric pressure,  $\text{FIO}_2$  fractional concentration of inspired  $\text{O}_2$  and  $\text{PaCO}_2$  the partial pressure of arterial carbon dioxide.

In addition, the duration of mechanical ventilation, the peak inspiratory pressure (PIP), the maximum PIP (PIPmax) and maximum  $\text{FiO}_2$  ( $\text{FiO}_2\text{max}$ ) at any point during ventilation, the PIP and  $\text{FiO}_2$  at extubation (PIPext,  $\text{FiO}_2$  ext) as well as blood gas measurements and ventilator settings prior to extubation were recorded.

All patients were ventilated on pressure controlled modes using the Evita 4 (Dräger Medical, Lubeck, Germany) ventilator and were switched to patient triggered, pressure supported modes for weaning. Patients had been sedated using morphine and midazolam and these medications were reduced during weaning and stopped prior to extubation. A patient was deemed to be ready for extubation following assessment by the attending physician in charge. The criteria on which

Harikumar R1

the decision to extubate was based primarily on each child's clinical condition, significant improvement or resolution of the underlying disease process, results of blood gas measurements and with ventilatory parameters ( $PIP \leq 20$  cmH<sub>2</sub>O and  $FiO_2 < 0.5$  on a patient triggered ventilator mode and sufficient wakefulness with airway protective reflexes. The decision to reintubate was also made by the clinician in charge and was based on clinical examination and the results of blood gas analysis. Criteria for reintubation were primarily rising respiratory rates and PaCO<sub>2</sub> levels and failure to maintain oxygenation. Other criteria included intercostal recession, tracheal tugging, diaphoresis and a poor cough/inability to protect airway or clear secretions. Extubation was performed into an appropriate amount of supplemental oxygen. Non-invasive mechanical ventilation was not used for any study patient. The clinical team were unaware of the results of the patient's respiratory measurements.

## **Analysis**

Data, tested using Shapiro-Wilk analysis, were demonstrated to be non-normally distributed and expressed, therefore, as median and range. Extubation failure was defined as reintubation and ventilation within 24 hours. Values of TTdi and TTmus in excess of their respective cutoffs were indicative of extubation failure, a true positive test. Patients achieving values above or below the cutoff who subsequently succeeded or failed extubation were either false positive or false negative results. Patients scoring below the cutoff values who subsequently were successfully extubated were true negative results.

## Results

Table E1. Spearman correlation coefficients for physiological data and extubation outcome related to age and duration of mechanical ventilation

|                         | Age          |          | Duration of Ventilation |         |
|-------------------------|--------------|----------|-------------------------|---------|
|                         | Coefficients | p value  | Coefficients            | p value |
| Age                     |              |          | -0.12                   | 0.31    |
| P0.1                    | -0.21        | 0.060    | 0.28                    | 0.01    |
| Pimax                   | -0.06        | 0.573    | 0.16                    | 0.16    |
| Vt/kg bodyweight        | 0.09         | 0.472    | -0.13                   | 0.28    |
| Ti                      | 0.71         | p<0.0001 | -0.12                   | 0.30    |
| Ttot                    | 0.64         | p<0.0001 | -0.14                   | 0.22    |
| RR                      | -0.07        | p<0.0001 | 0.13                    | 0.24    |
| ttmus                   | 0.20         | 0.080    | 0.05                    | 0.69    |
| Crs/kg bodyweight       | -0.15        | 0.296    | -0.09                   | 0.53    |
| Rrs                     | -0.85        | p<0.0001 | 0.14                    | 0.34    |
| FRC                     | 0.95         | p<0.0001 | -0.12                   | 0.33    |
| FRC/kg                  | 0.25         | 0.050    | -0.15                   | 0.25    |
| Extubation outcome      | 0.01         | 0.937    | 0.14                    | 0.22    |
| RSB                     | 0.49         | p<0.0001 | 0.21                    | 0.08    |
| CROP                    | 0.35         | p<0.0001 | -0.26                   | 0.03    |
| Duration of ventilation | -0.12        | 0.307    |                         |         |
| FRC/cm                  | 0.89         | p<0.0001 | -0.14                   | 0.27    |
| Ti/Ttot                 | -0.18        | 0.110    | 0.06                    | 0.61    |



|              |      |       |      |      |
|--------------|------|-------|------|------|
| meanPi       | 0.31 | 0.005 | 0.12 | 0.31 |
| meanPi/Pimax | 0.28 | 0.012 | 0.01 | 0.90 |

Table E2 The results of the subgroup of 28 children in whom invasive measurements were performed according to extubation outcome

Data are presented as median (range)

| Variable                         | Success (n=25)       | Failure (n=3)         | P value |
|----------------------------------|----------------------|-----------------------|---------|
| Age (years)                      | 1.4 (0.15 – 15)      | 3 (0.2 – 14)          | 0.681   |
| Weight (kg)                      | 12 (2.6 – 65)        | 14 (3 – 57)           | 0.457   |
| Height (cm)                      | 77 (52 – 165)        | 98 (54 – 160)         | 0.527   |
| Vt/kg bodyweight (ml/kg)         | 7.2 (4.2 – 21.6)     | 5.5 (5.1 – 6.9)       | 0.244   |
| Ti (s)                           | 0.63 (0.34 – 1.55)   | 0.97 (0.58 – 0.98)    | 0.298   |
| Ttot (s)                         | 1.77 (0.71 – 10.4)   | 1.62 (1.11 – 2.19)    | 0.882   |
| Ti/Ttot                          | 0.36 (0.15 - 0.66)   | 0.52 (0.45 - 0.60)    | 0.044   |
| RR (bpm)                         | 35.2 (6.1 – 85)      | 37.2 (27.5 – 57.5)    | 0.738   |
| P0.1 (cmH <sub>2</sub> O)        | 2.9 (1.5 – 6.4)      | 3.3 (2.5 – 3.6)       | 0.970   |
| meanPi (cmH <sub>2</sub> O)      | 11.3 (5.9 – 25.9)    | 10.7 (8.5 – 11.9)     | 0.710   |
| Pimax (cmH <sub>2</sub> O)       | 58.8 (33.4 – 98.5)   | 31 (21.5 – 42.1)      | 0.005   |
| meanPi/Pimax                     | 0.16 (0.07 – 0.46)   | 0.40 (0.39 - 0.44)    | 0.0116  |
| meanPdi (cmH <sub>2</sub> O)     | 10.3 (3.5 - 30.0)    | 10.0 (7.2 - 13.9)     | 0.372   |
| Pdimax (cmH <sub>2</sub> O)      | 46.4 (15.3 – 122.0)  | 28.3 (28.1 – 39.5)    | 0.106   |
| meanPdi/Pdimax                   | 0.18 (0.06 - 0.61)   | 0.35 (0.26 - 0.36)    | 0.0302  |
| PTPdi (cmH <sub>2</sub> O/s/min) | 235.3 (85.9 – 668.0) | 309.1 (259.2 – 357.0) | 0.143   |
| TTdi                             | 0.07 (0.02 – 0.12)   | 0.16 (0.15 – 0.19)    | 0.005   |
| TTmus                            | 0.07 (0.02 – 0.12)   | 0.21 (0.2 – 0.23)     | 0.005   |

|                                              |                       |                       |       |
|----------------------------------------------|-----------------------|-----------------------|-------|
| Crs/kg bodyweight (ml/cmH <sub>2</sub> O/kg) | 1.05 (0.55 – 1.83)    | 0.94 (0.94 – 0.98)    | 0.789 |
| Rrs (cmH <sub>2</sub> O/l/s)                 | 26.54 (10.83 – 79.07) | 37.7 (37.7 – 37.7)    | 0.535 |
| FRC (ml)                                     | 255.0 (57.5 – 1585.0) | 242.0 (54.5 – 1114.5) | 0.694 |
| FRC/kg bodyweight (ml/kg)                    | 21.2 (19.2 – 24.9)    | 18.2 (17.3 – 19.6)    | 0.013 |
| FRC/cm body length (ml/cm)                   | 3.2 (1.0 – 9.6)       | 2.5 (1.0 – 7.0)       | 0.600 |
| RSB                                          | 6.1 (0.3 – 17.3)      | 5.4 (5 – 11.3)        | 0.547 |
| CROP                                         | 1.3 (0.3 – 2.9)       | 0.4 (0.2 – 0.5)       | 0.402 |
| Duration of ventilation (days)               | 5 (1 – 83)            | 12 (12 – 43)          | 0.109 |
| PIPmax (cmH <sub>2</sub> O)                  | 22 (16 – 28)          | 28 (26 – 36)          | 0.022 |
| FIO <sub>2</sub> max                         | 0.5 (0.35 – 1)        | 1 (0.7 – 1)           | 0.022 |
| PIP at extubation (cmH <sub>2</sub> O)       | 16 (12 – 18)          | 17 (16 – 17)          | 0.338 |
| FIO <sub>2</sub> at extubation               | 0.3 (0.21 – 0.33)     | 0.3 (0.26 – 0.33)     | 0.560 |
| PaO <sub>2</sub> at extubation (mmHg)        | 92.3 (34.5 – 140.25)  | 53.3 (44.25 – 62.25)  | 0.064 |
| PaCO <sub>2</sub> at extubation (mmHg)       | 44.3 (32.2 – 61.4)    | 44.6 (38.6 – 51)      | 0.603 |
| Mean airway pressure                         |                       |                       |       |
| at extubation (cmH <sub>2</sub> O)           | 7.0 (5.0 – 8.0)       | 7.0 (7.0 – 8.0)       | 0.262 |
| PAO <sub>2</sub> (mmHg)                      | 168.8 (99.5 – 190.7)  | 169.3 (134.4 – 196.7) | 0.795 |
| Time from measurements                       |                       |                       |       |
| to extubation (hrs)                          | 1.0 (0.25 – 6.0)      | 1.0 (1 – 2.0)         | 0.497 |

Table E3. Sensitivity and specificity of predictors of extubation failure and areas under the ROC curve for the 28 subjects in whom invasive measurements were performed.

| Variable                                                | Area under ROC curve | Value   | Sensitivity (%) | Specificity (%) | P value |
|---------------------------------------------------------|----------------------|---------|-----------------|-----------------|---------|
| TTmus                                                   | 1.000                | >0.18   | 100             | 100             | 0.005   |
| TTdi                                                    | 1.000                | >0.15   | 100             | 100             | 0.005   |
| Pimax (cmH <sub>2</sub> O)                              | 1.000                | >32.2   | 100             | 100             | 0.005   |
| FRC/kg bodyweight (ml/kg)                               | 0.956                | >18.7   | 67              | 100             | 0.013   |
| PIPmax (cmH <sub>2</sub> O)                             | 0.907                | >27     | 67              | 84              | 0.023   |
| PaO <sub>2</sub> at extubation (mmHg)                   | 0.902                | <64.5   | 100             | 87              | 0.064   |
| FIO <sub>2</sub> max                                    | 0.900                | >0.95   | 67              | 92.0            | 0.026   |
| meanPdi/Pdimax                                          | 0.818                | <0.12   | 50              | 91              | 0.144   |
| Duration of Ventilation (days)                          | 0.787                | >11     | 100             | 72              | 0.11    |
| PTPdi (cmH <sub>2</sub> O/s/min)                        | 0.722                | >308.05 | 67              | 79.2            | 2.17    |
| Vt/kg bodyweight (ml/kg)                                | 0.710                | <6.7    | 67              | 52              | 0.245   |
| Rrs (cmH <sub>2</sub> O/l/sec)                          | 0.692                | >36.1   | 100             | 69.2            | 0.535   |
| Crs (ml/cmH <sub>2</sub> O)                             | 0.692                | <13.34  | 100             | 69.2            | 0.535   |
| Inspiratory Time (s)                                    | 0.687                | >0.905  | 67              | 80              | 0.298   |
| CROP Index                                              | 0.674                | <0.1    | 50              | 57              | 0.423   |
| PIP at extubation (cmH <sub>2</sub> O)                  | 0.667                | >16.5   | 33              | 64              | 0.353   |
| Mean airway pressure at extubation (cmH <sub>2</sub> O) | 0.660                | >7.5    | 33              | 88              | 0.373   |

|                                              |       |         |     |      |       |
|----------------------------------------------|-------|---------|-----|------|-------|
| meanPdi (cmH2O)                              | 0.66  | <6.91   | 33  | 64   | 0.373 |
| TToes                                        | 0.659 | >0.045  | 33  | 100  | 0.38  |
| meanPi/Pimax                                 | 0.64  | <0.14   | 33  | 68   | 0.435 |
| Ti/Ttot                                      | 0.627 | >0.48   | 33  | 76   | 0.48  |
| RSB Index                                    | 0.609 | >10.9   | 33  | 87   | 0.547 |
| FRC/cm body length (ml/cm)                   | 0.595 | <1.05   | 33  | 95   | 0.6   |
| PaCO <sub>2</sub> at extubation (mmHg)       | 0.593 | >50.8   | 33  | 96   | 0.603 |
| FIO <sub>2</sub> at extubation               | 0.587 | >0.315  | 33  | 96   | 0.629 |
| Crs/kg bodyweight (ml/cmH <sub>2</sub> O/kg) | 0.583 | <0.99   | 100 | 58   | 0.789 |
| meanPi (cmH2O)                               | 0.573 | <9.66   | 67  | 64   | 0.683 |
| FRC (ml)                                     | 0.571 | <104.85 | 33  | 81   | 0.694 |
| RR (bpm)                                     | 0.560 | >57.2   | 33  | 80   | 0.738 |
| Ttot (s)                                     | 0.527 | <1.13   | 33  | 68   | 0.882 |
| P0.1 (cmH2O)                                 | 0.493 | >3.5    | 33  | 64   | 0.970 |
| PAO <sub>2</sub> (mmHg)                      | 0.453 | >136.06 | 33  | 88   | 0.795 |
| Pdimax (cmH <sub>2</sub> O)                  | 0.206 | >38.15  | 33  | 33.3 | 0.106 |

## References

- E1. Beardsmore, C., P. Helms, J. Stocks, D. J. Hatch, and M. Silverman. 1980. Improved esophageal balloon technique for use in infants. *J Appl Physiol* 49(4):735-742.
- E2. Baydur, A., P. K. Behrakis, W. A. Zin, M. Jaeger, and J. Milic Emili. 1982. A simple method for assessing the validity of the esophageal balloon technique. *Am Rev Respir Dis* 126(5):788-91.
- E3. Manczur, T. I., A. Greenough, G. F. Rafferty, and A. D. Milner. 2000. Measurement of pulmonary mechanics in the paediatric intensive care unit: a comparison of techniques during pressure- and volume-limited ventilation. *Pediatr Pulmonol* 30:265-268.
- E4. Clanton, T. L., P. M. Calverley, and B. Celli. 2002. Tests of respiratory muscle endurance: ATS/ERS statement on respiratory muscle testing. *Am J Respir Crit Care Med* 166(559-569).
